# Supplementary material for: Convenient syntheses of 2-acylamino-4-halothiazoles and acylated derivatives using a versatile Boc-intermediate
Source: Royal Society of Chemistry journal article supplement (doi:10.1039/d4ra04959d), 2024-01-01
Supplement: d4ra04959d1.pdf [file d4ra04959d1.pdf]

## **Convenient syntheses of 2-acylamino-4-halothiazoles and acylated derivatives using a versatile Boc-intermediate**

Sophie Pate, Joshua Taujanskas, Robyn Wells, Craig M. Robertson, Paul M. O'Neill and Andrew V. Stachulski\*

*Department of Chemistry, University of Liverpool, Liverpool L69 7ZD, U.K.*

### **Supporting Information**

1. Photocopy <sup>1</sup>H and <sup>13</sup>C NMR spectra for compounds described,
2. Full Cif crystallographic data files for **13**, **15** and **19**.

\*

---

\* To whom correspondence should be addressed: [stachuls@liv.ac.uk](mailto:stachuls@liv.ac.uk) or 0151-794-3482

# 1. Photocopy 1H (400 MHz) and 13C (100 MHz) NMR spectra for compounds described

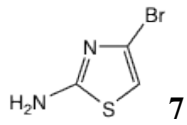

Account MChem  
 submitted by A. V. Stachulski  
 sample\_name AVS01-152  
 lab number 4th. floor  
 11/11/11 09:13 (E:\NMR\400M-152-11-11-11)

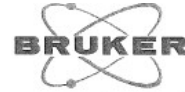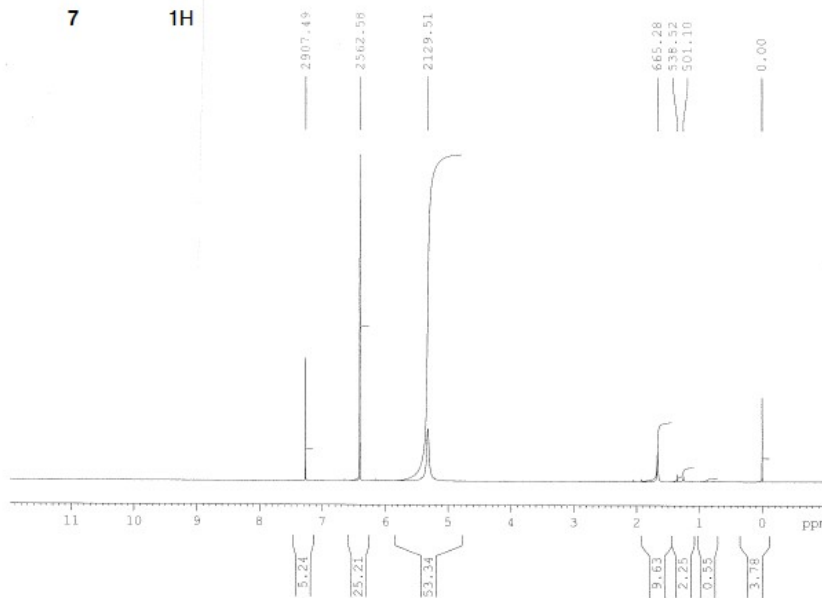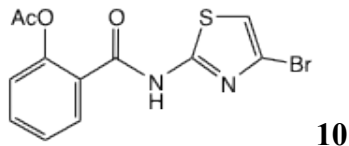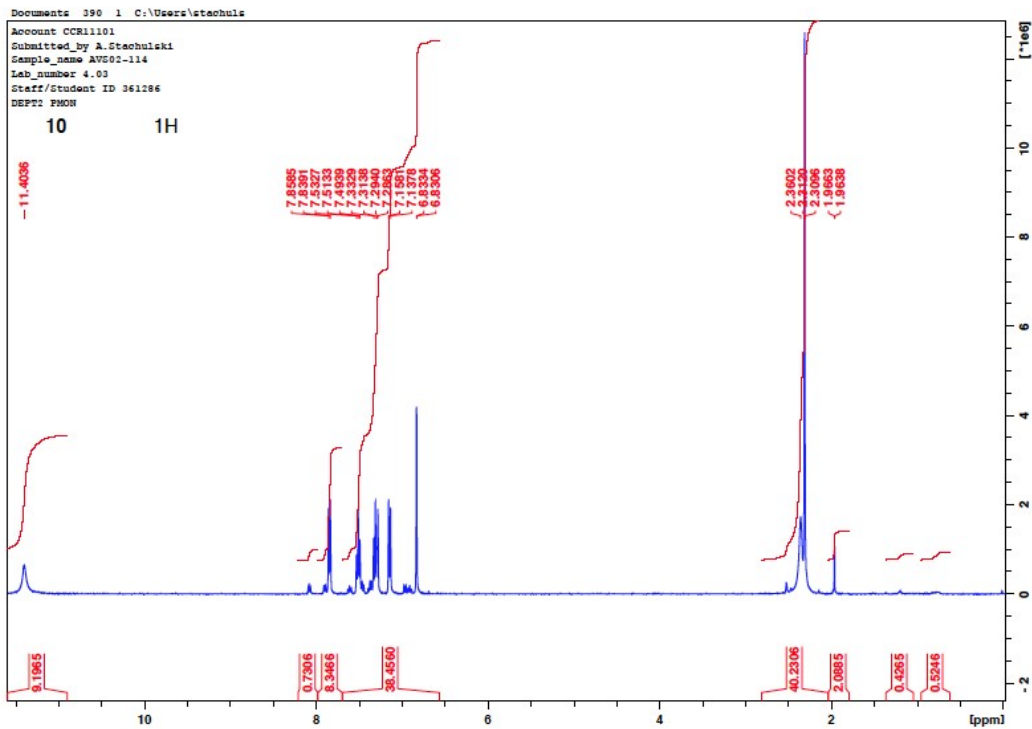

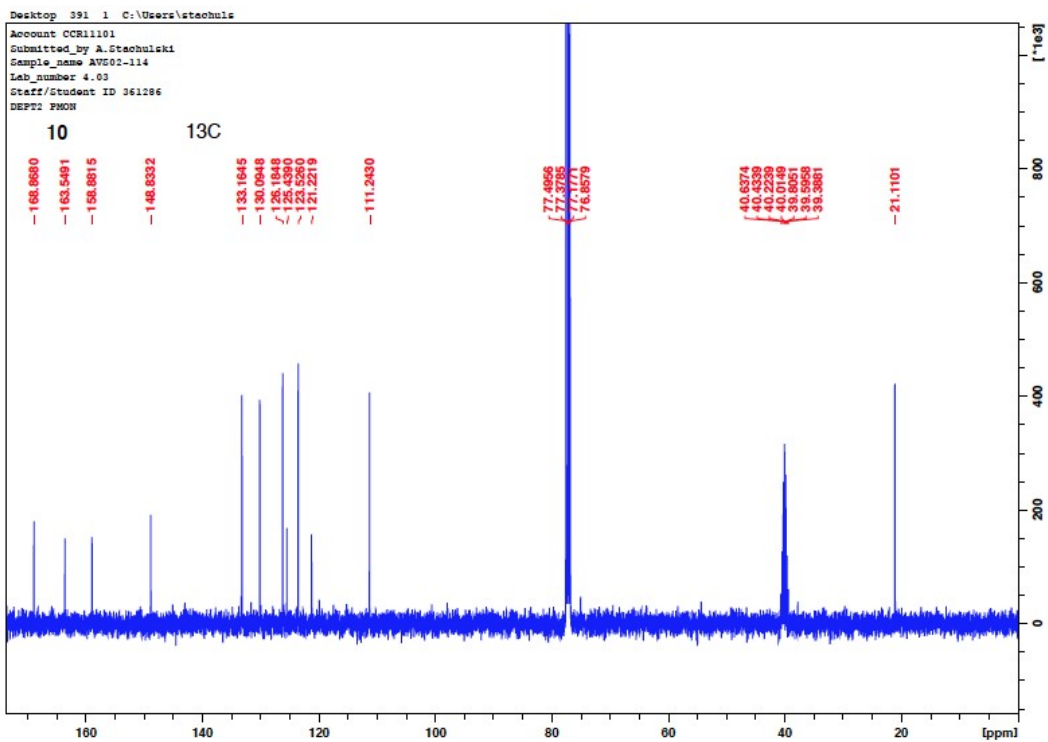

Contains a little d<sub>6</sub>-DMSO for solubility.

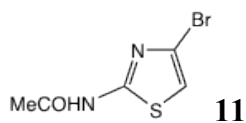

Account MChem  
 submitted by A. V. Stachulski  
 sample name AVS01-143(ii)  
 lab number 4th. floor

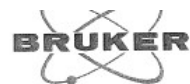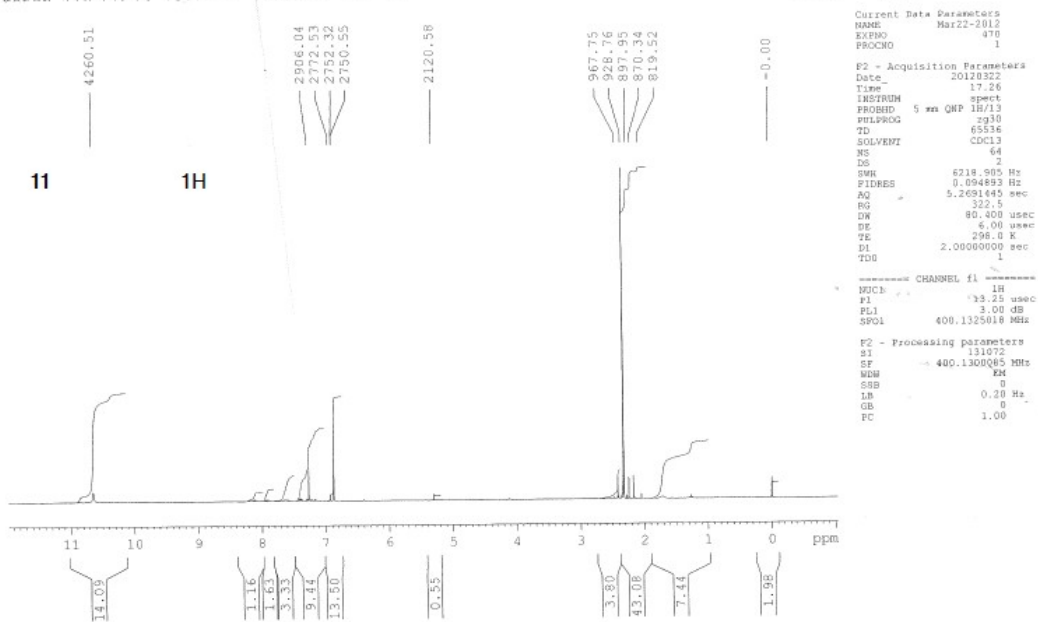

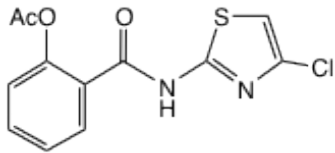

12

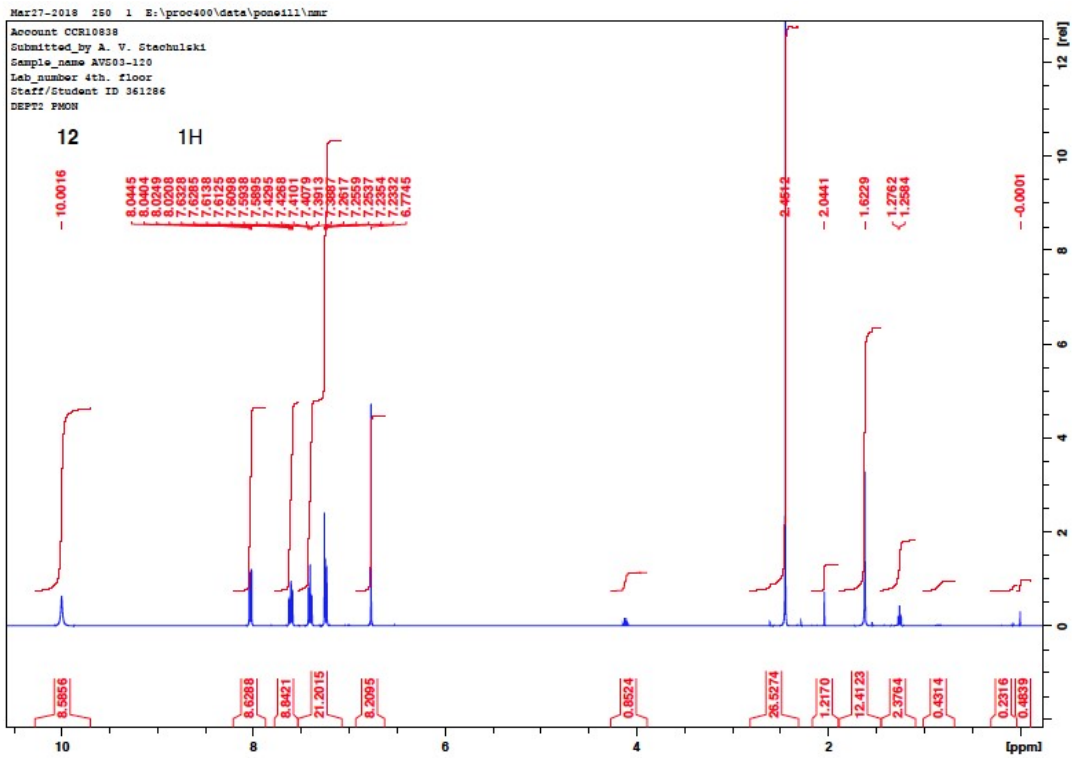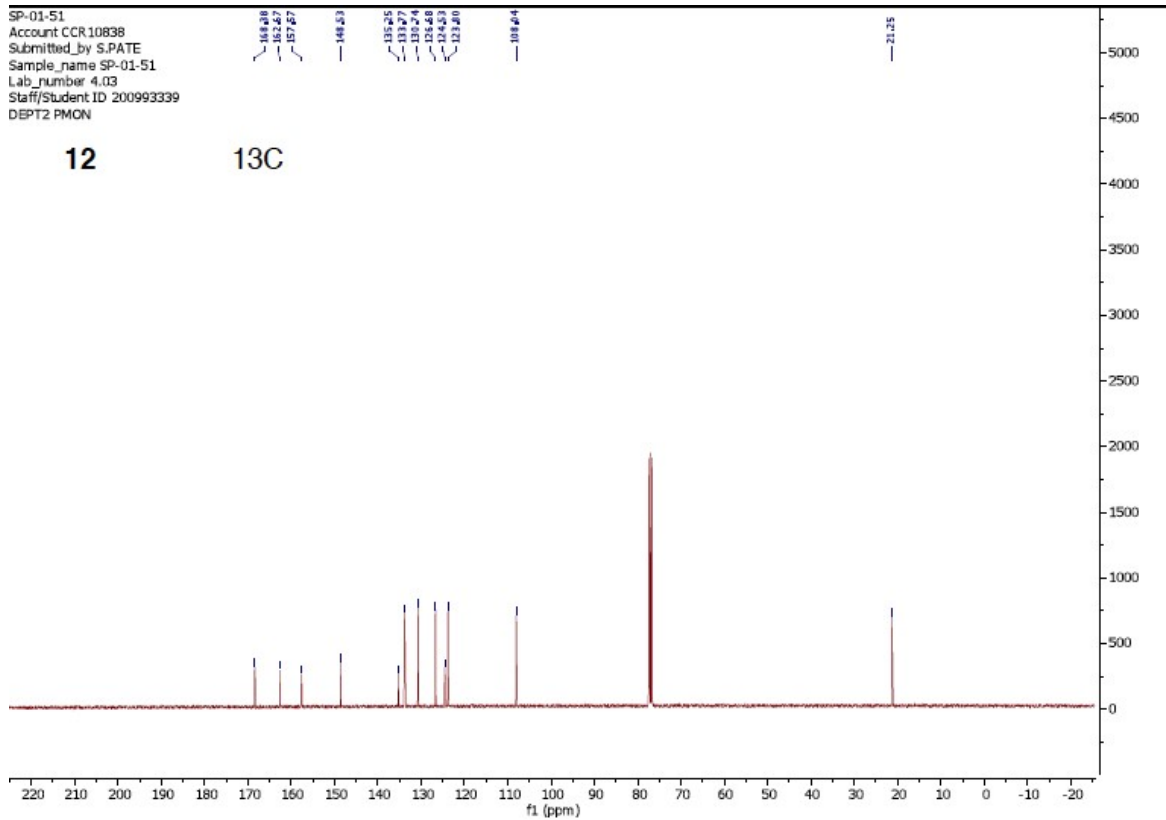

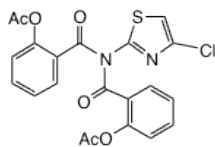

13

Account CCR10838  
 Submitted\_by A. V. Stachulski  
 Sample\_name AVS 02-156  
 Lab\_number 4th. floor

13 1H

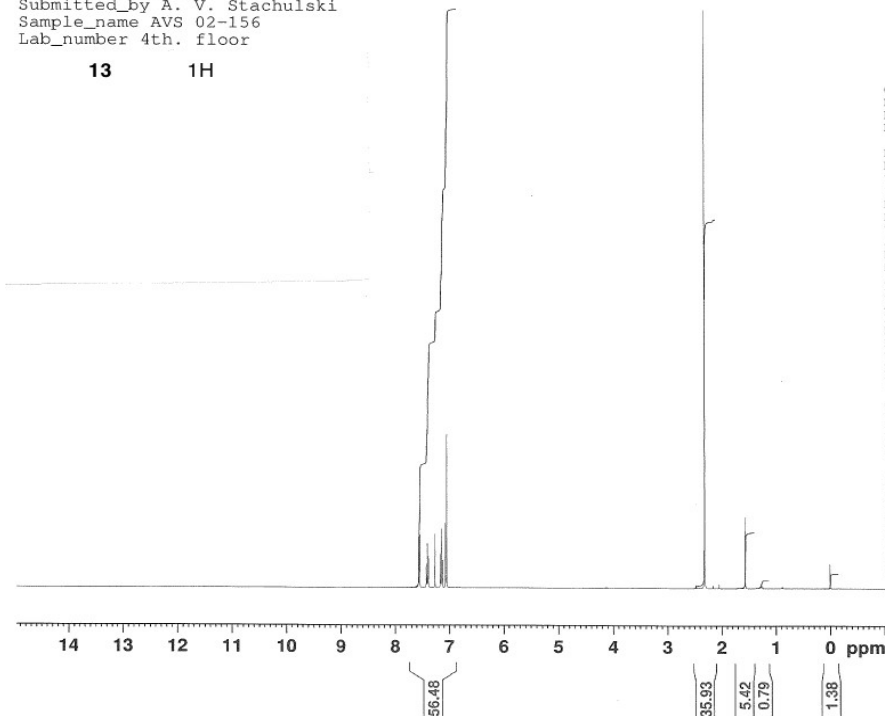

Current Data Parameters  
 NAME Sep10-2014  
 EXPNO 200  
 PROCNO 1

F2 - Acquisition Parameters  
 Date\_ 20140910  
 Time 14.02  
 INSTRUM spect  
 PROBHD 5 mm PABBO BB/  
 PULPROG zg30  
 TD 65536  
 SOLVENT CDCl3  
 NS 64  
 DS 2  
 SWH 6393.862 Hz  
 FIDRES 0.097563 Hz  
 AQ 5.1249151 sec  
 RG 205.49  
 DW 78.200 usec  
 DE 6.50 usec  
 TE 298.0 K  
 D1 1.0000000 sec  
 TDO 1

----- CHANNEL f1 -----  
 SF01 400.1328009 MHz  
 NUC1 1H  
 P1 10.00 usec  
 PLW1 21.0000000 W

F2 - Processing parameters  
 SI 65536  
 SF 400.1300098 MHz  
 WDW EM  
 SSB 0  
 LB 0.30 Hz  
 GB 0  
 PC 1.00

Account CCR10838  
 Submitted\_by A. V. Stachulski  
 Sample\_name AVS 02-156  
 Lab\_number 4th. floor

13 13C

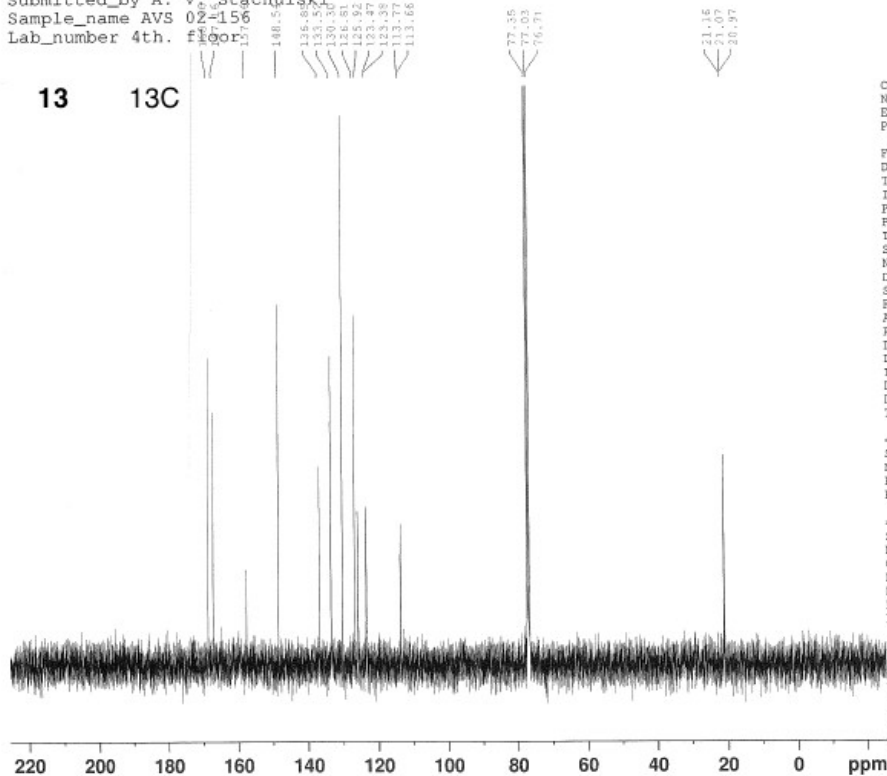

Current Data Parameters  
 NAME Sep10-2014  
 EXPNO 201  
 PROCNO 1

F2 - Acquisition Parameters  
 Date\_ 20140910  
 Time 16.24  
 INSTRUM spect  
 PROBHD 5 mm PABBO BB/  
 PULPROG zgpg30  
 TD 65536  
 SOLVENT CDCl3  
 NS 460  
 DS 4  
 SWH 25252.525 Hz  
 FIDRES 0.385323 Hz  
 AQ 1.2976128 sec  
 RG 205.49  
 DW 19.800 usec  
 DE 6.50 usec  
 TE 298.0 K  
 D1 2.0000000 sec  
 D11 0.0300000 sec  
 TDO 1

----- CHANNEL f1 -----  
 SF01 100.6228303 MHz  
 NUC1 13C  
 P1 10.00 usec  
 PLW1 46.0000000 W

----- CHANNEL f2 -----  
 SF02 400.1316005 MHz  
 NUC2 1H  
 CPDPRG2 waltz16  
 PCPD2 90.00 usec  
 PLW2 21.0000000 W  
 PLW12 0.26973000 W  
 PLW13 0.21848001 W

F2 - Processing parameters  
 SI 32768  
 SF 100.6127690 MHz  
 WDW EM  
 SSB 0  
 LB 1.00 Hz  
 GB 0  
 PC 1.40

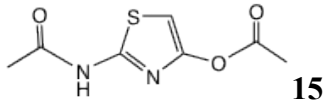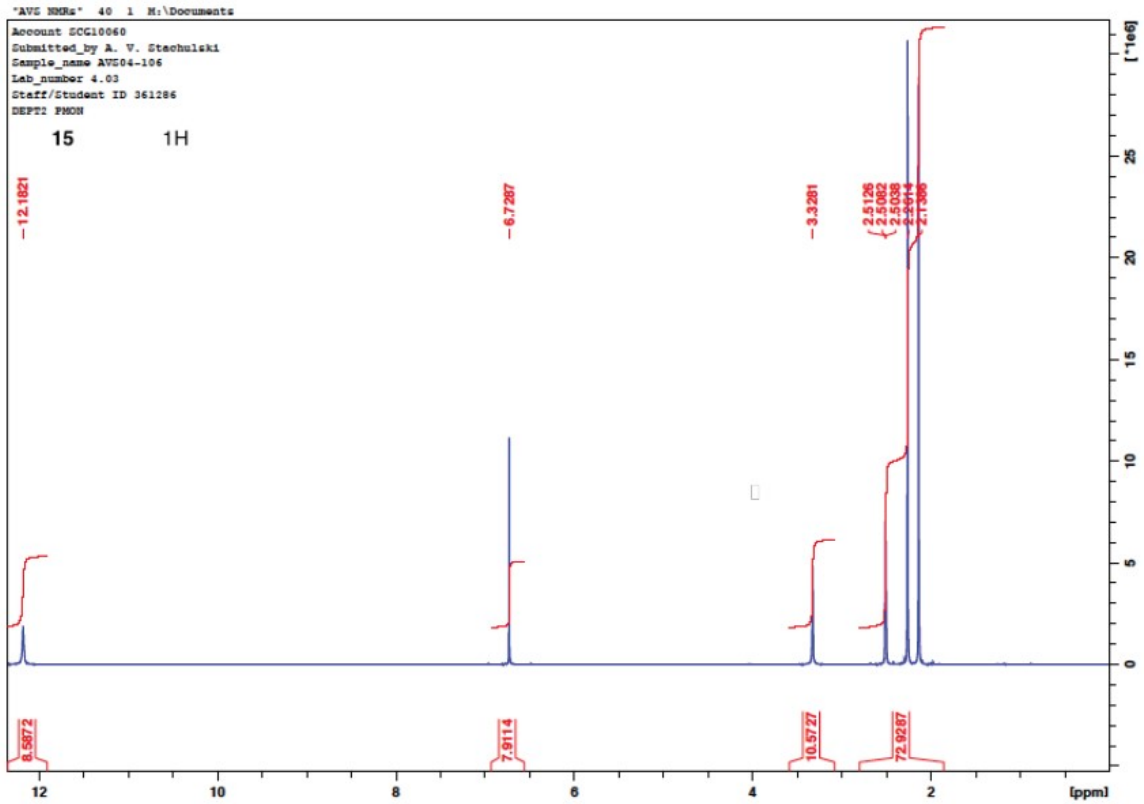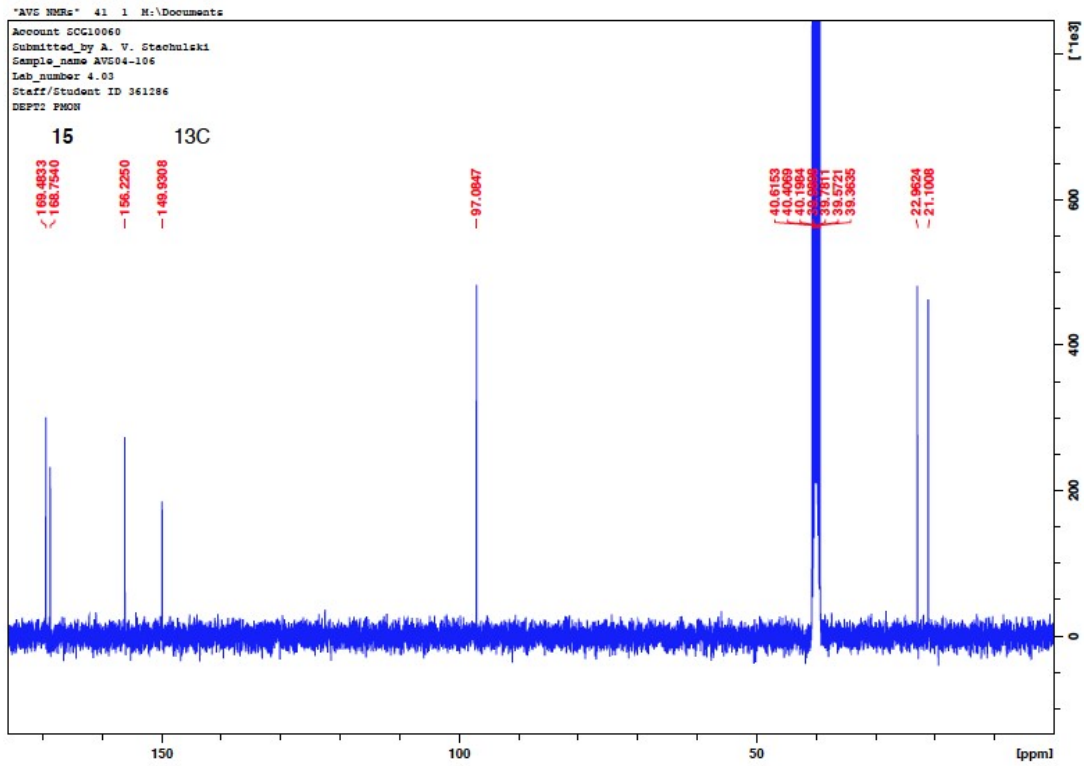

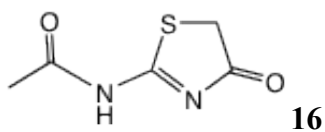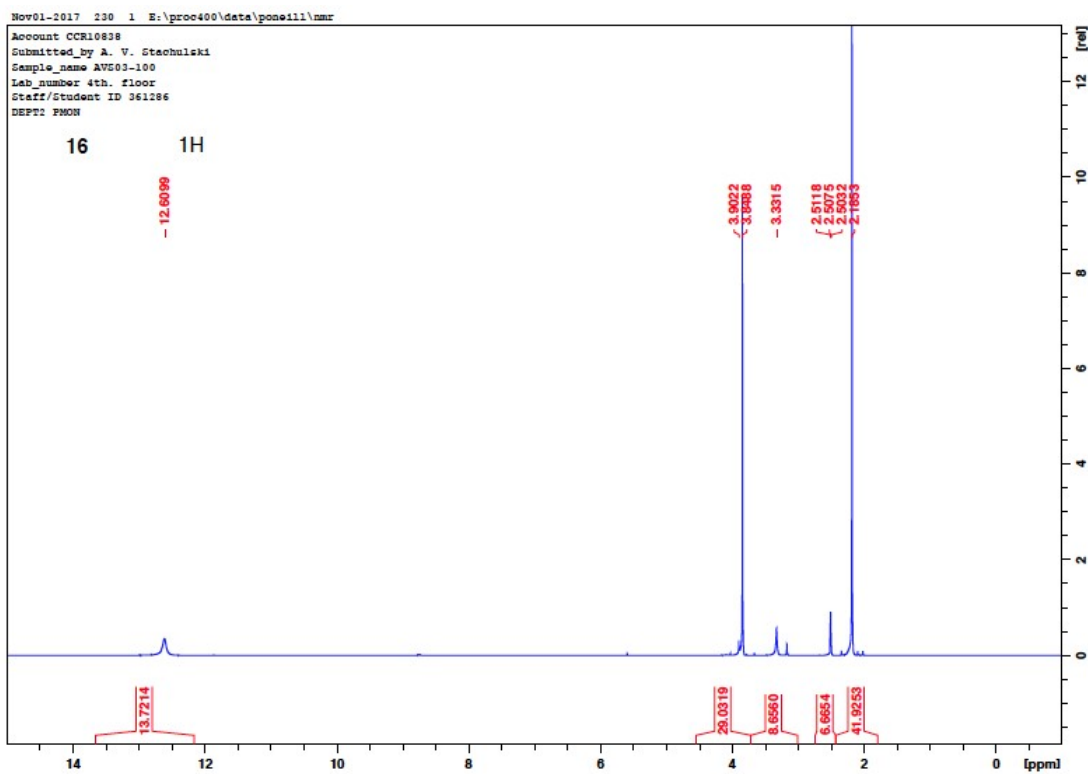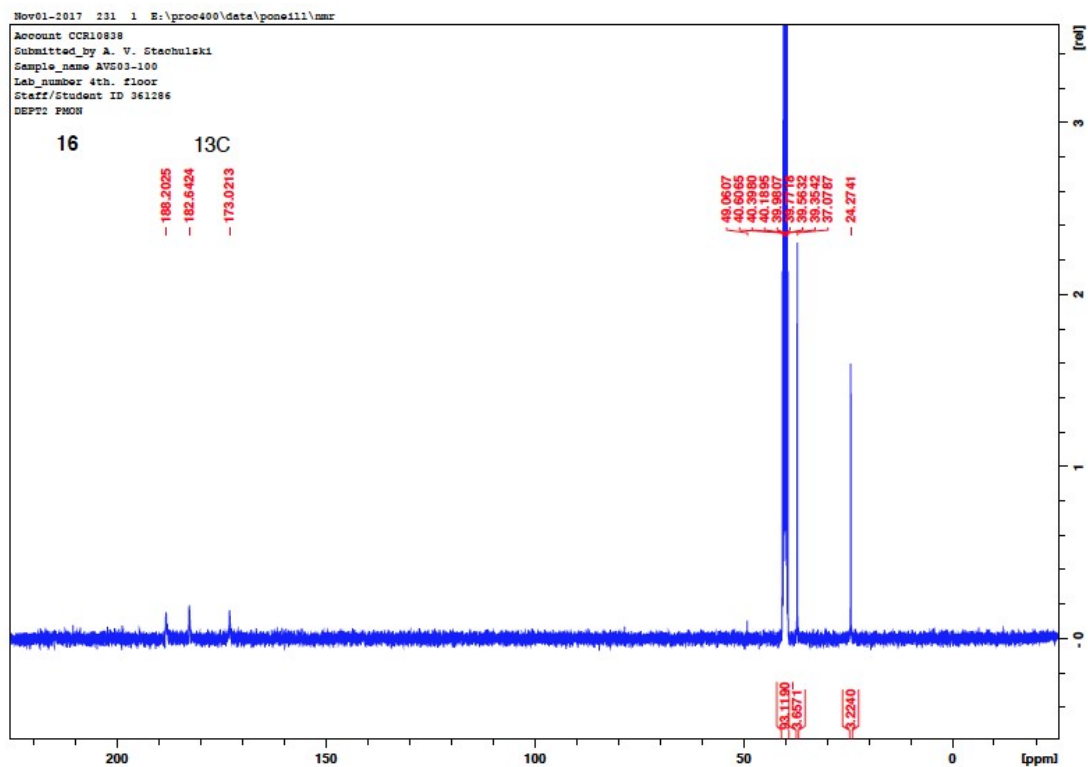

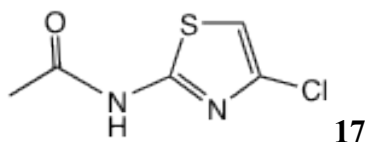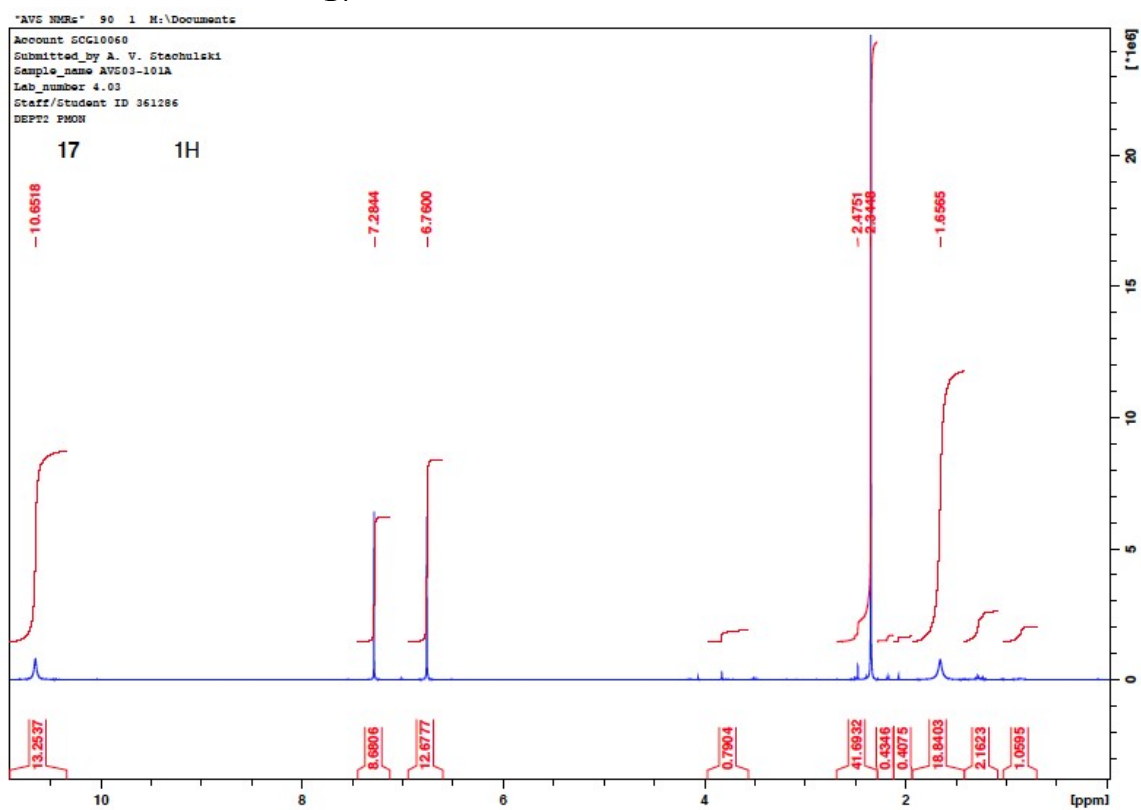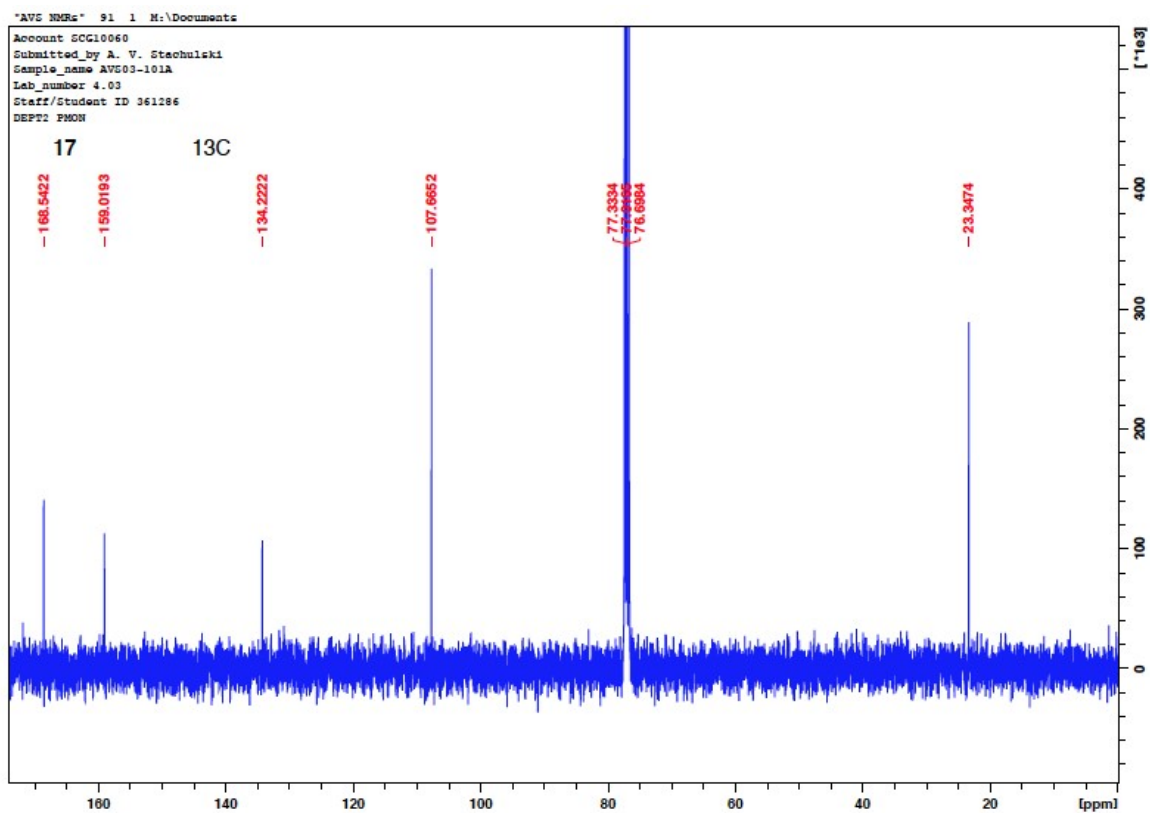



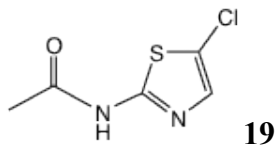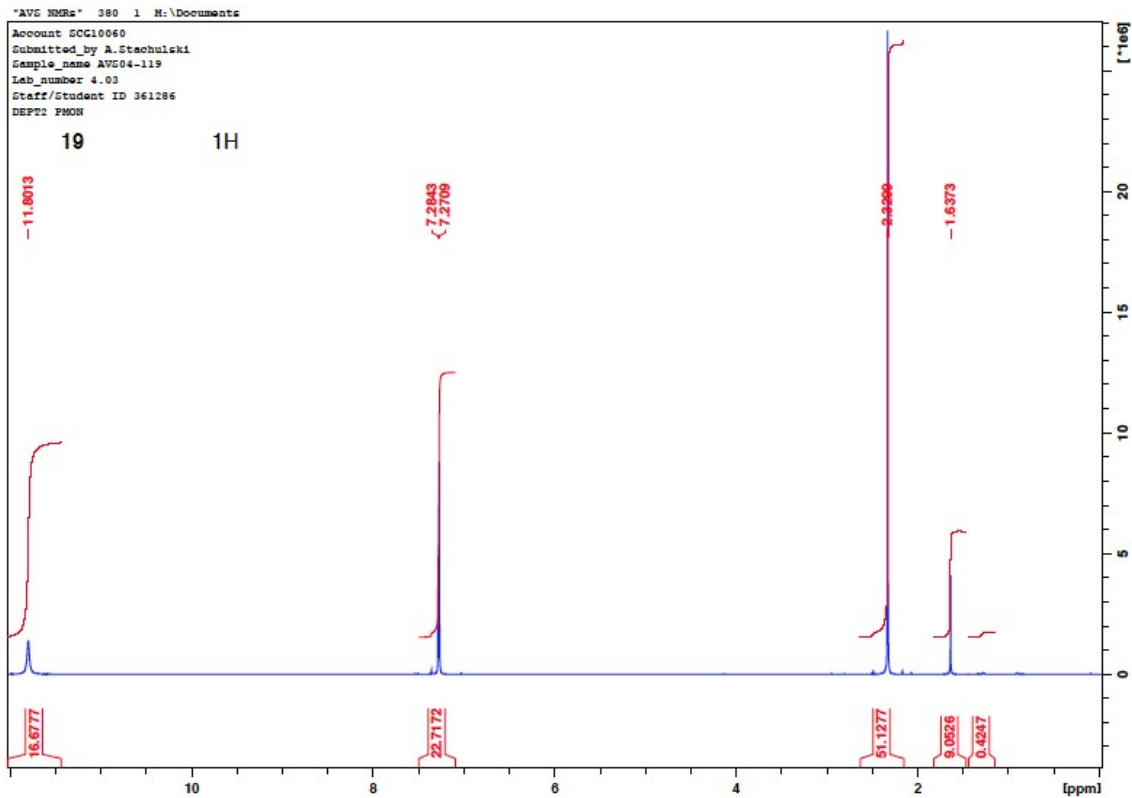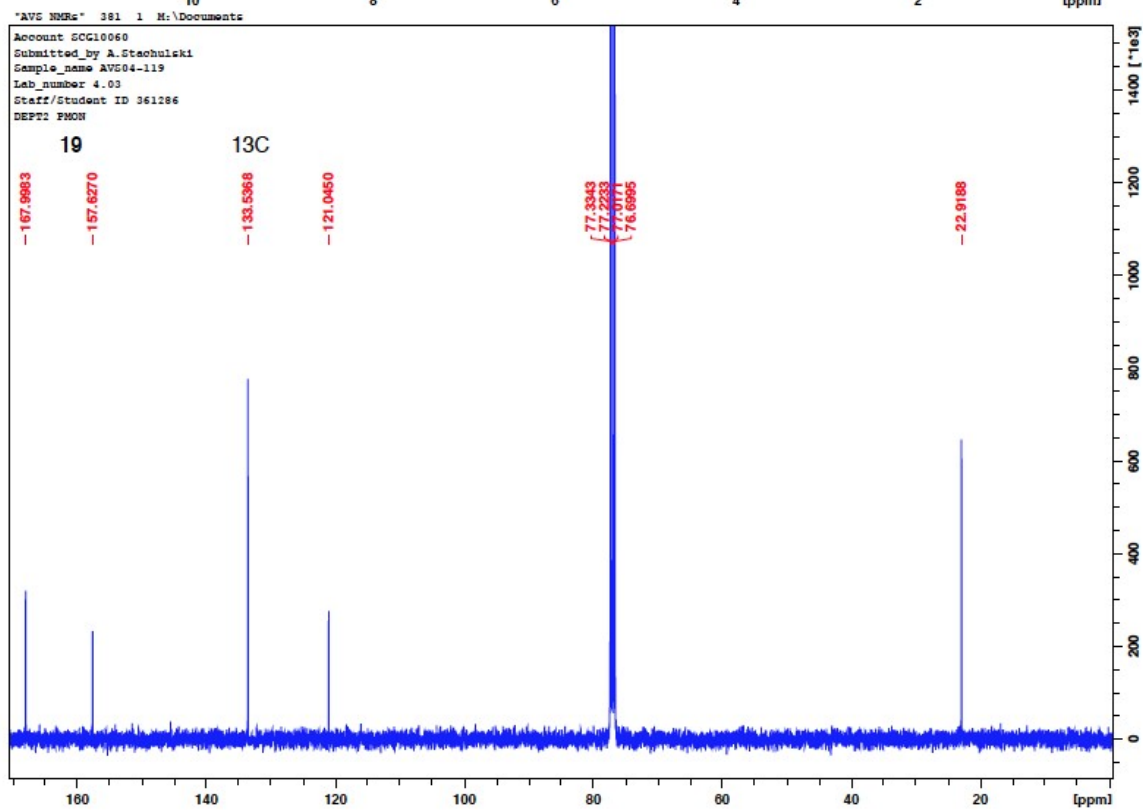

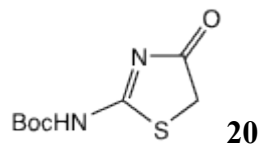

Nov13-2017 260 1 E:\proc400\data\pone111\nmr

Account CCR10838  
 Submitted by A. V. Stachulski  
 Sample\_name AVS03-103  
 Lab\_number 4th. floor  
 Staff/Student ID 361286  
 DEPT: PMON

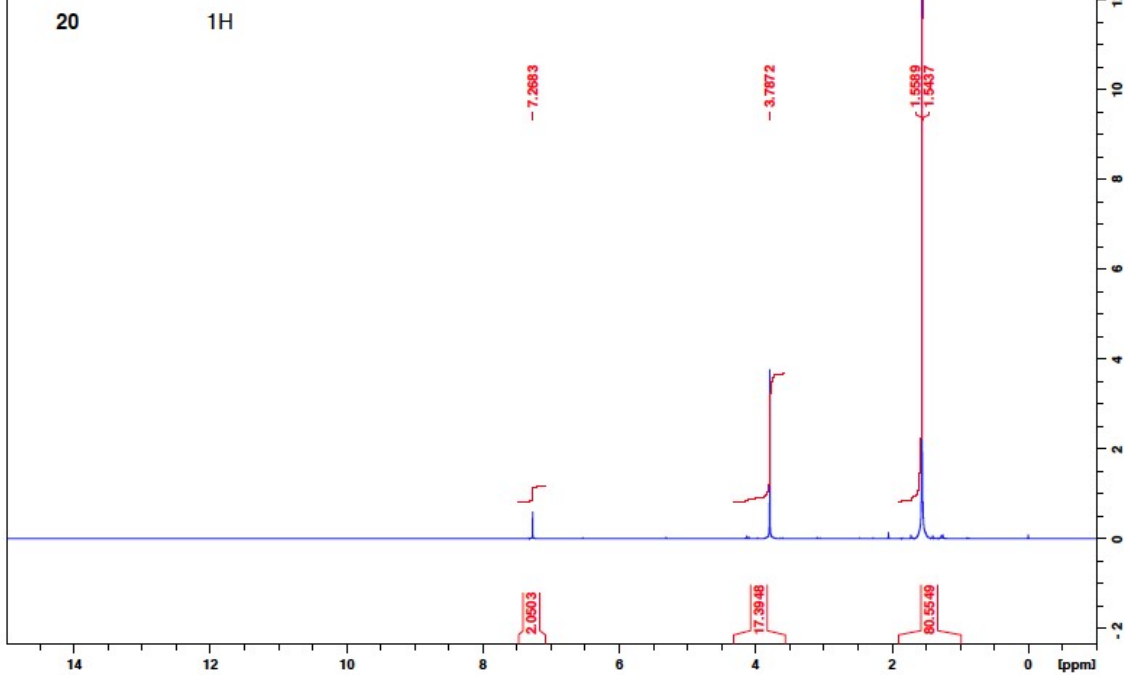

Nov14-2017 51 1 E:\proc400\data\pone111\nmr

Account CCR10838  
 Submitted by A. V. Stachulski  
 Sample\_name AVS03-103  
 Lab\_number 4th. floor  
 Staff/Student ID 361286  
 DEPT: PMON

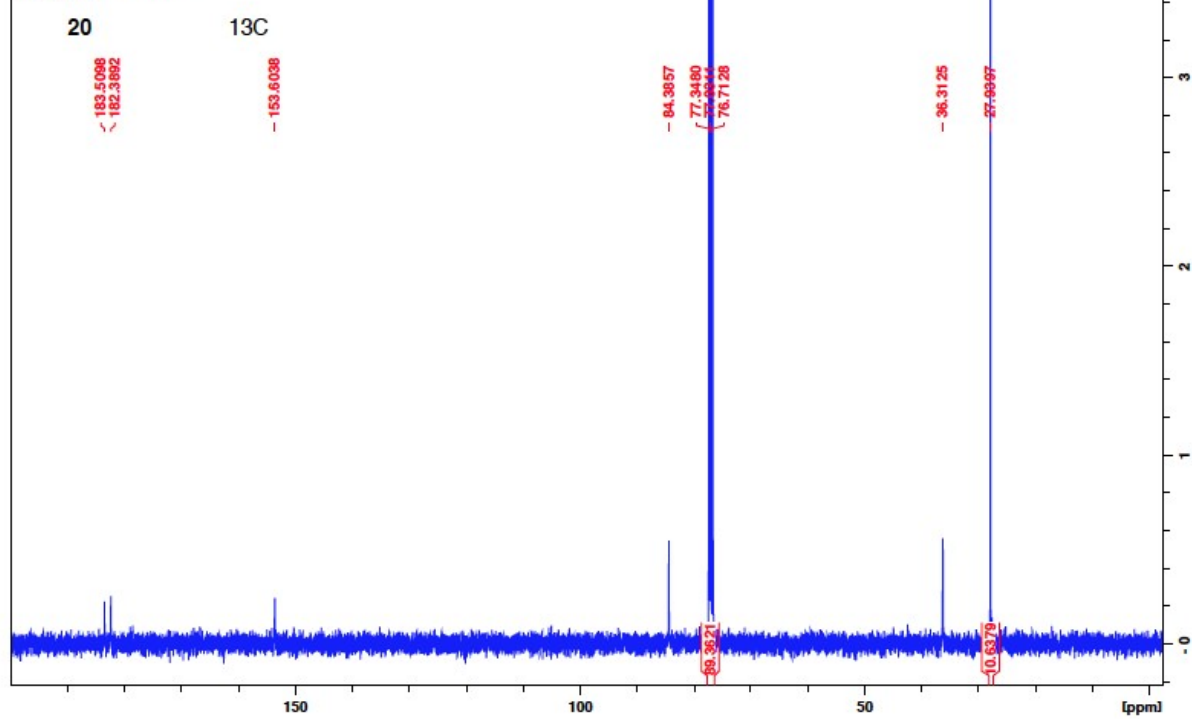

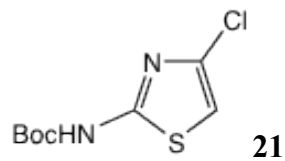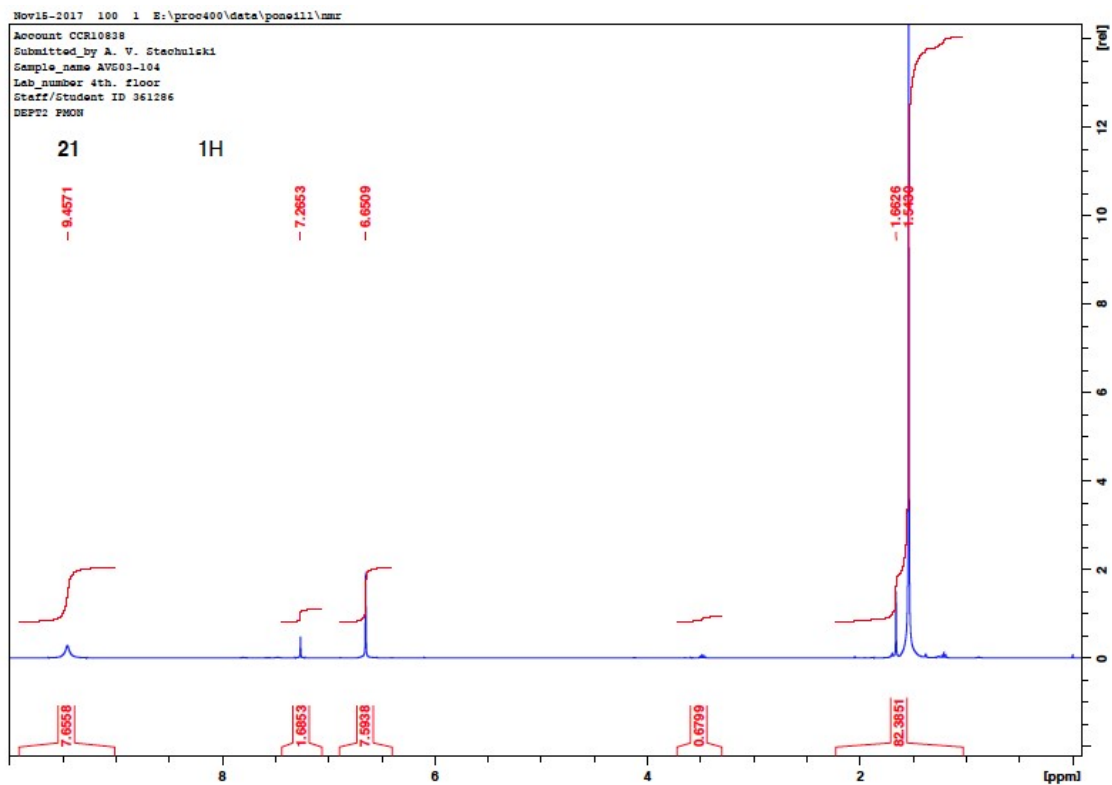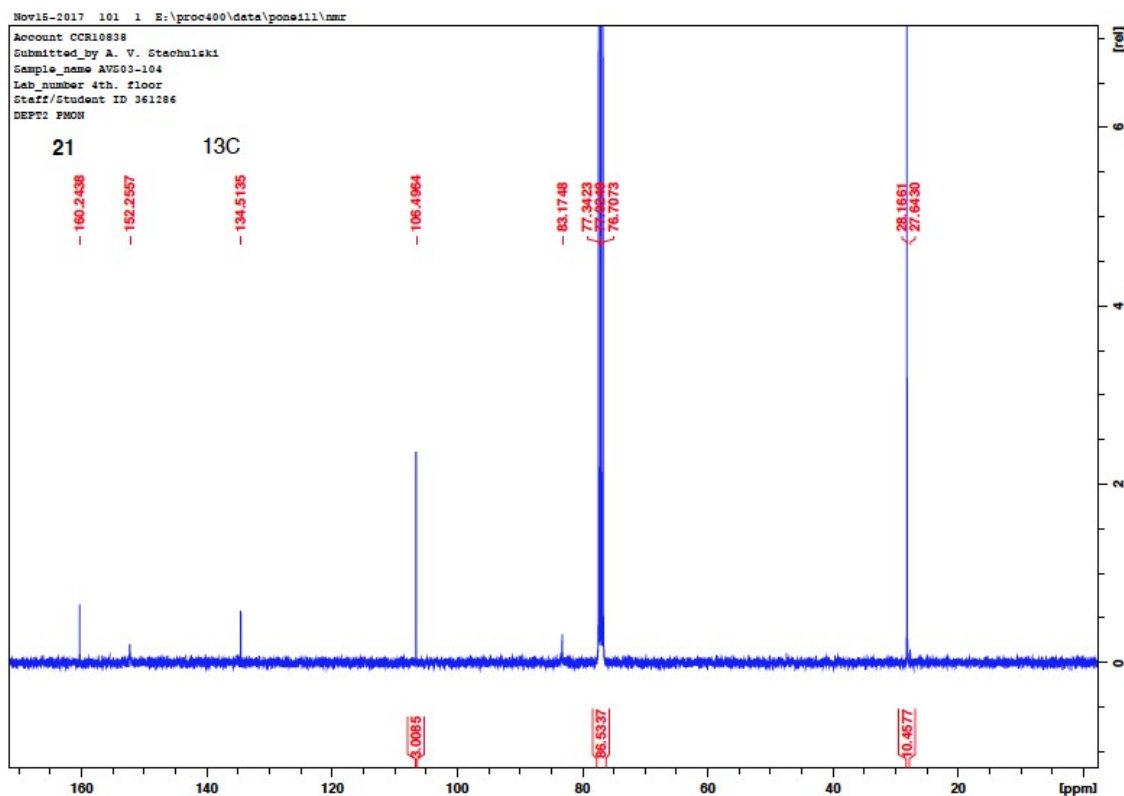

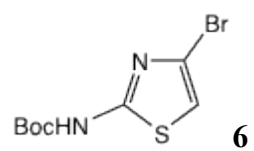

**6** 1H

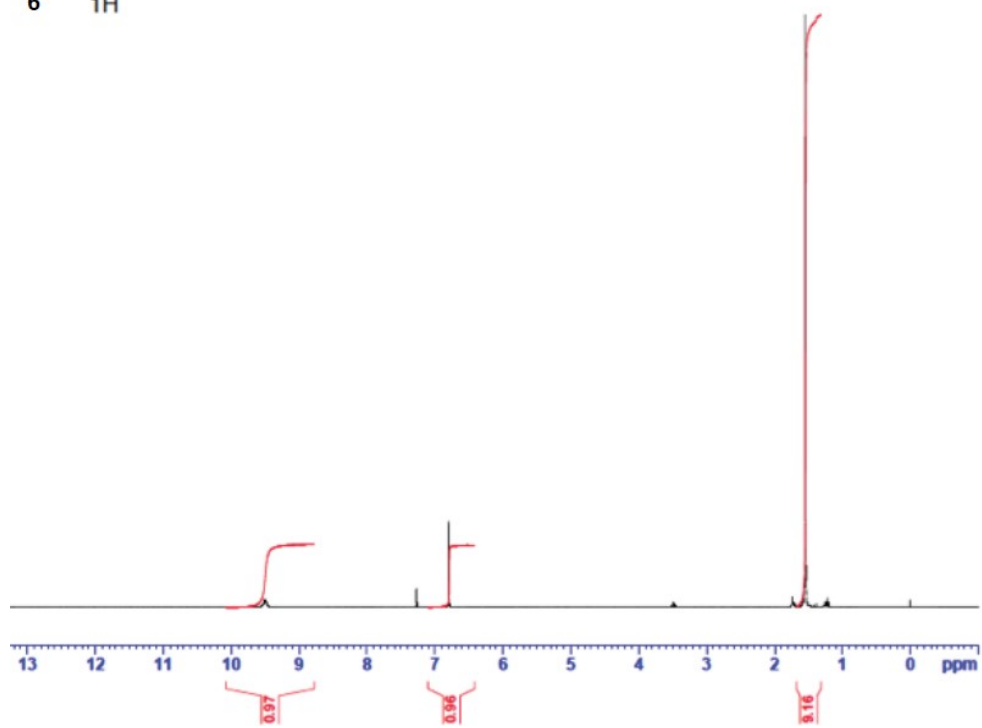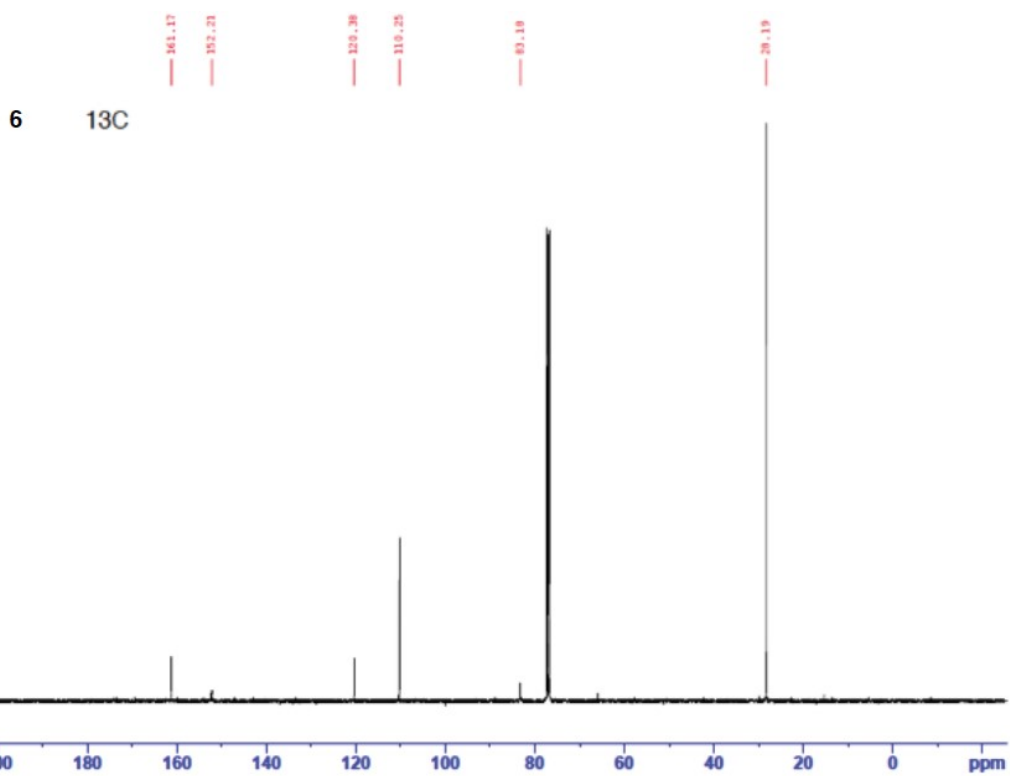

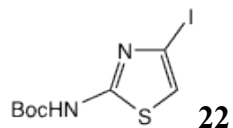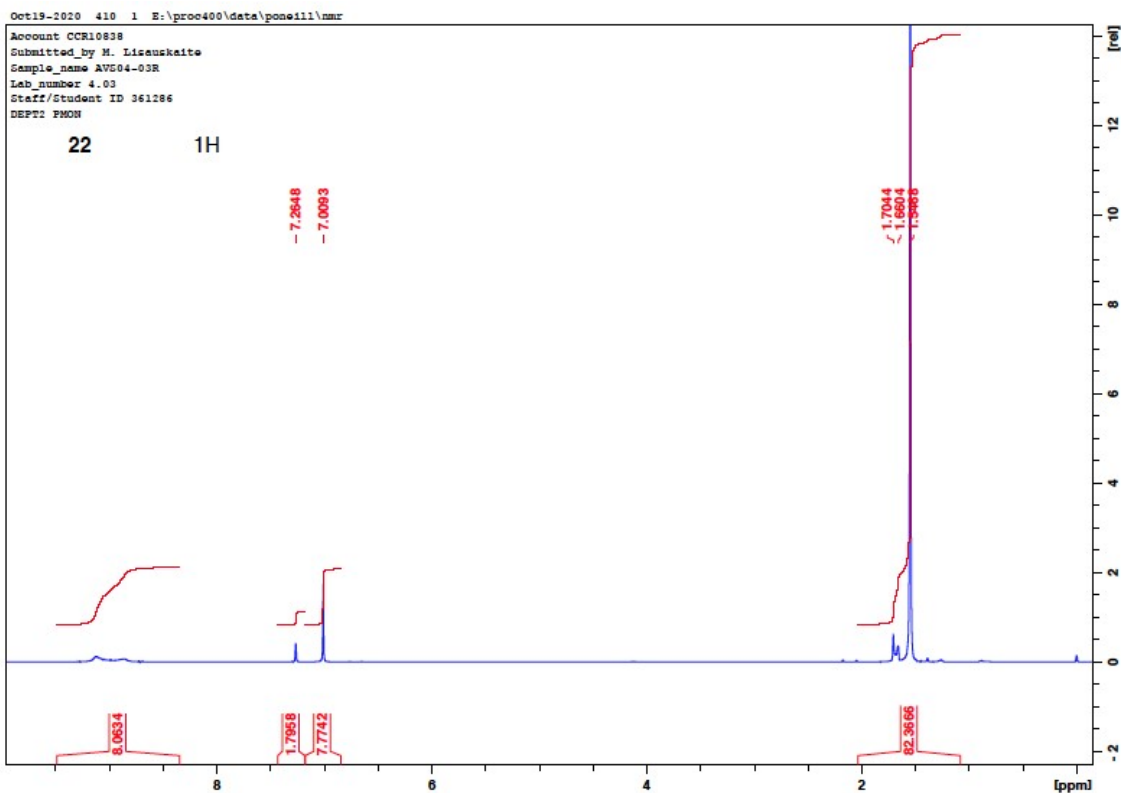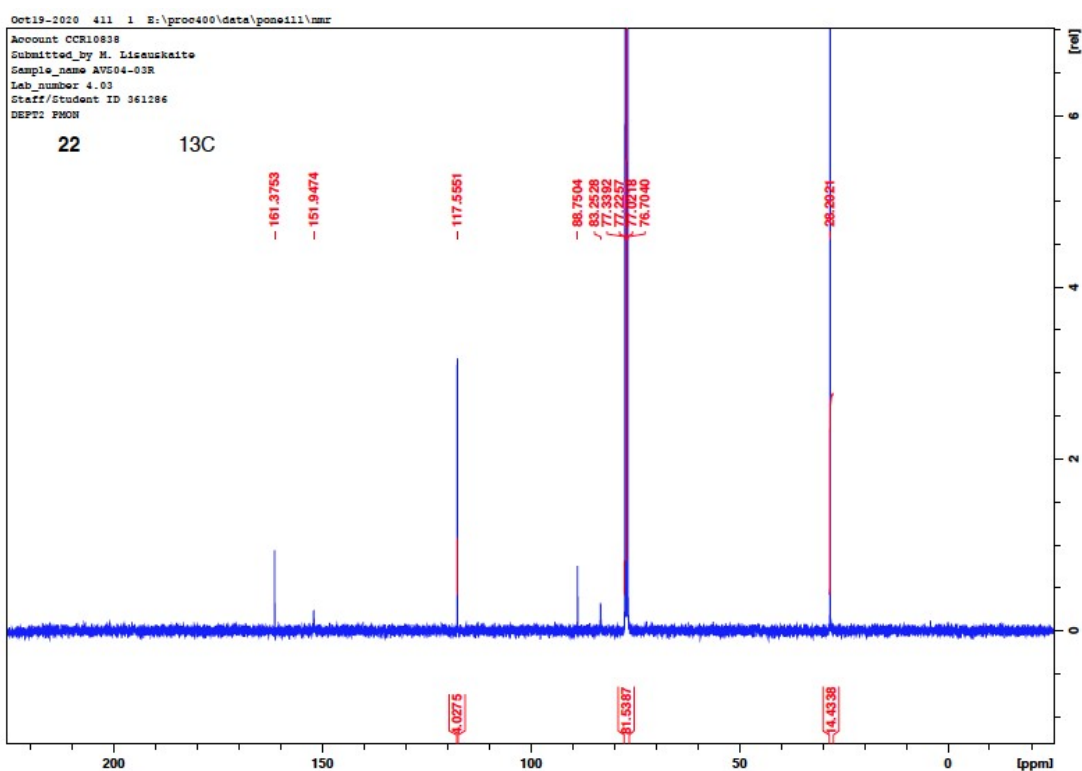

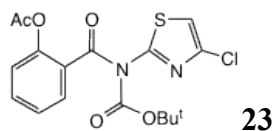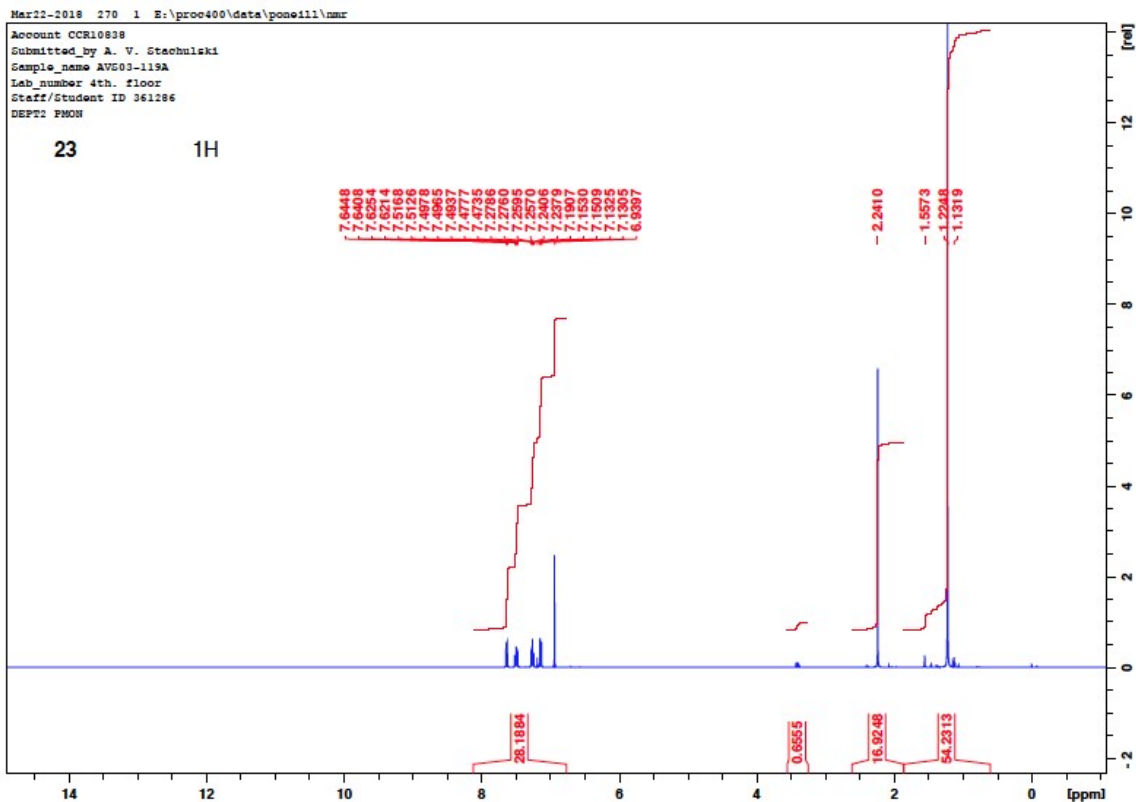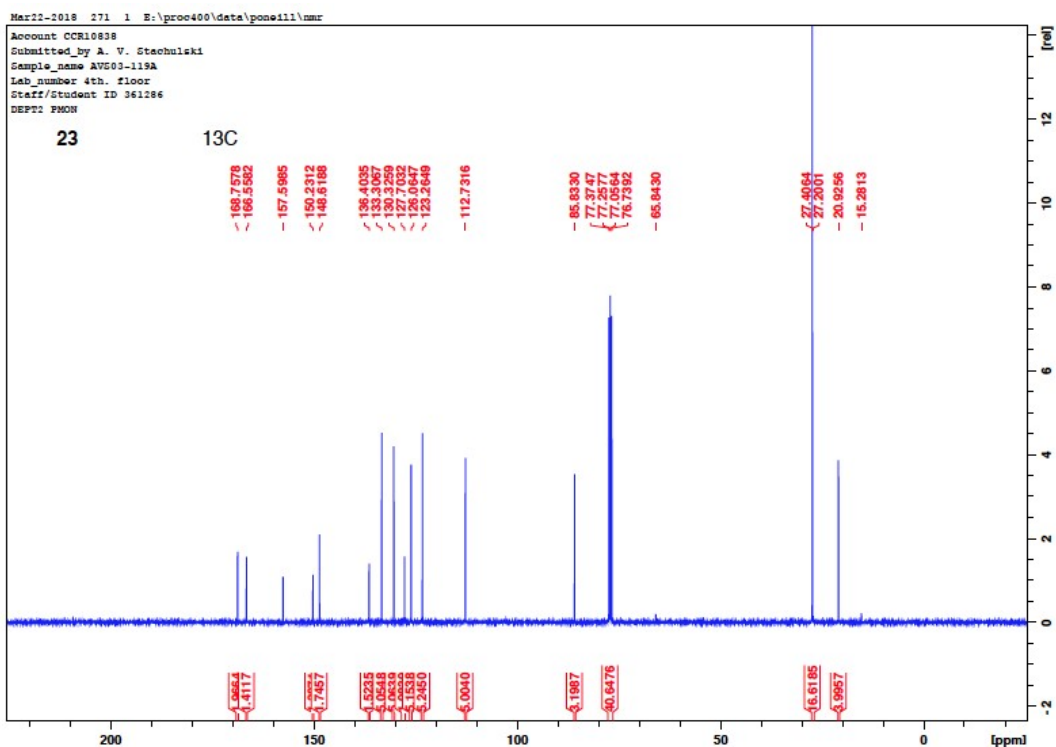

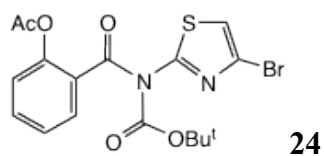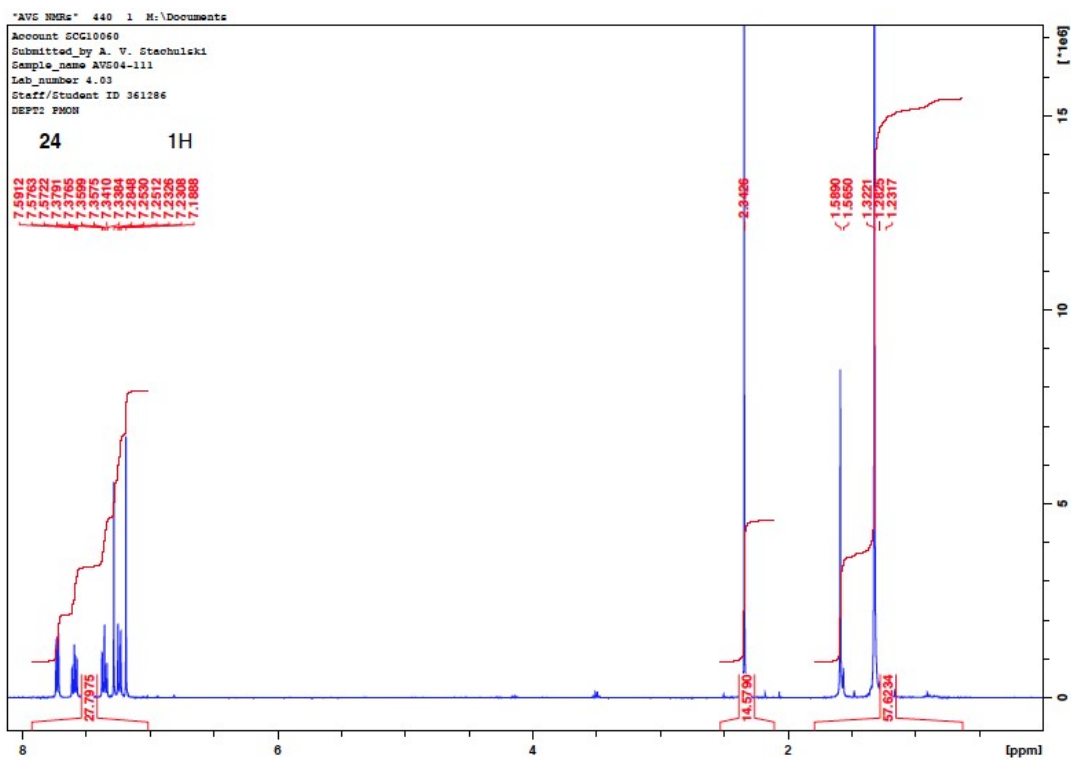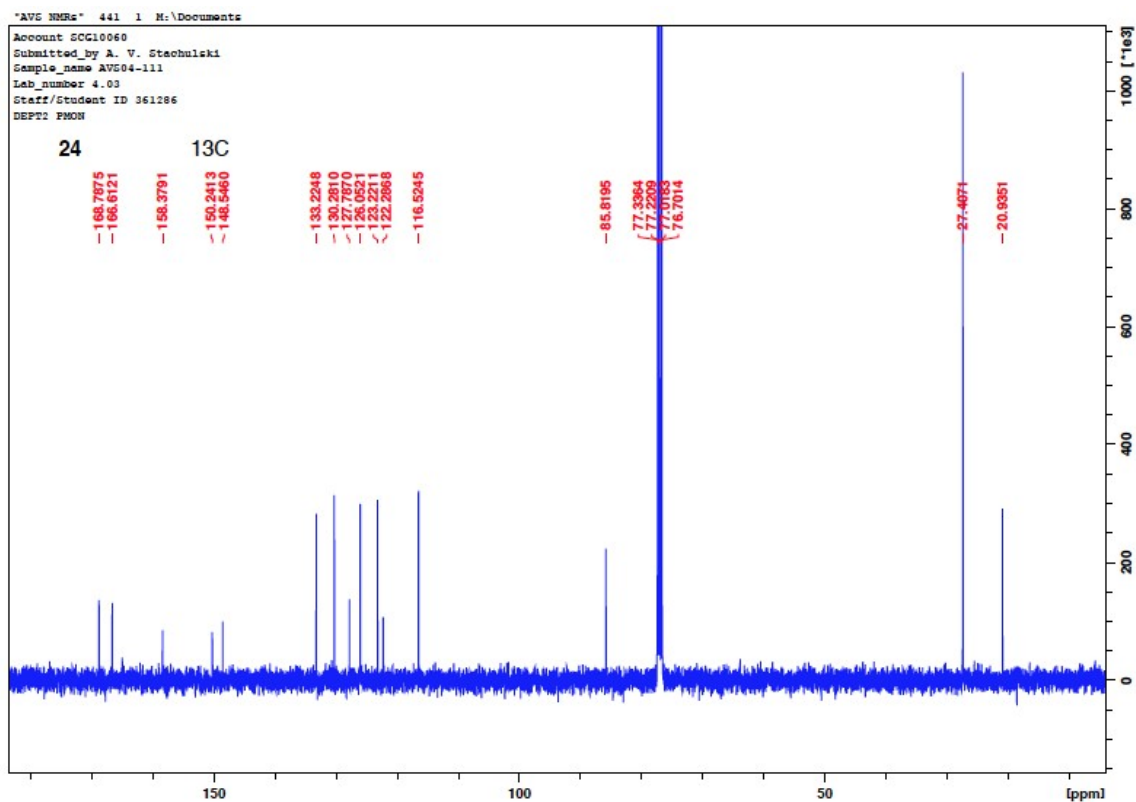

## 2. Full Cif crystallographic data files

### Compound 13 CCDC 2362657.

Table 1 Crystal data and structure refinement for **13**.

|                                             |                                                                                               |
|---------------------------------------------|-----------------------------------------------------------------------------------------------|
| Identification code                         | AVS_02_156                                                                                    |
| Empirical formula                           | C <sub>41</sub> H <sub>30</sub> Cl <sub>2</sub> N <sub>4</sub> O <sub>12</sub> S <sub>2</sub> |
| Formula weight                              | 917.72                                                                                        |
| Temperature/K                               | 150.01(10)                                                                                    |
| Crystal system                              | orthorhombic                                                                                  |
| Space group                                 | <i>Pna2(1)</i>                                                                                |
| a/Å                                         | 20.4035(6)                                                                                    |
| b/Å                                         | 8.6054(3)                                                                                     |
| c/Å                                         | 23.5849(6)                                                                                    |
| α/°                                         | 90.00                                                                                         |
| β/°                                         | 90.00                                                                                         |
| γ/°                                         | 90.00                                                                                         |
| Volume/Å <sup>3</sup>                       | 4141.0(2)                                                                                     |
| Z                                           | 4                                                                                             |
| ρ <sub>calc</sub> /cm <sup>3</sup>          | 1.472                                                                                         |
| μ/mm <sup>-1</sup>                          | 0.327                                                                                         |
| F(000)                                      | 1888.0                                                                                        |
| Crystal size/mm <sup>3</sup>                | 0.2 × 0.02 × 0.02                                                                             |
| Radiation                                   | Mo Kα (λ = 0.71073)                                                                           |
| 2θ range for data collection/°              | 5.14 to 52.8                                                                                  |
| Index ranges                                | -25 ≤ h ≤ 25, -10 ≤ k ≤ 8, -29 ≤ l ≤ 29                                                       |
| Reflections collected                       | 18121                                                                                         |
| Independent reflections                     | 6797 [R <sub>int</sub> = 0.0471, R <sub>sigma</sub> = 0.0375]                                 |
| Data/restraints/parameters                  | 561/0/7                                                                                       |
| Goodness-of-fit on F <sup>2</sup>           | 1.042                                                                                         |
| Final R indexes [I ≥ 2σ (I)]                | R <sub>1</sub> = 0.0441, wR <sub>2</sub> = 0.0999                                             |
| Final R indexes [all data]                  | R <sub>1</sub> = 0.0584, wR <sub>2</sub> = 0.1082                                             |
| Largest diff. peak/hole / e Å <sup>-3</sup> | 0.68/-0.50                                                                                    |

### Compound 15 CCDC 2330479.

Table 1 Crystal data and structure refinement for **15**.

|                     |                |
|---------------------|----------------|
| Identification code | AVS04_106_auto |
|---------------------|----------------|



|                                             |                                                               |
|---------------------------------------------|---------------------------------------------------------------|
| Empirical formula                           | C <sub>7</sub> H <sub>8</sub> N <sub>2</sub> O <sub>3</sub> S |
| Formula weight                              | 200.21                                                        |
| Temperature/K                               | 100.01(10)                                                    |
| Crystal system                              | orthorhombic                                                  |
| Space group                                 | Pbcn                                                          |
| a/Å                                         | 22.162(3)                                                     |
| b/Å                                         | 7.1809(10)                                                    |
| c/Å                                         | 10.8505(15)                                                   |
| α/°                                         | 90                                                            |
| β/°                                         | 90                                                            |
| γ/°                                         | 90                                                            |
| Volume/Å <sup>3</sup>                       | 1726.8(4)                                                     |
| Z                                           | 8                                                             |
| ρ <sub>calc</sub> /cm <sup>3</sup>          | 1.540                                                         |
| μ/mm <sup>-1</sup>                          | 0.349                                                         |
| F(000)                                      | 832.0                                                         |
| Crystal size/mm <sup>3</sup>                | 0.22 × 0.05 × 0.02                                            |
| Radiation                                   | Mo Kα (λ = 0.71073)                                           |
| 2θ range for data collection/°              | 5.964 to 60.416                                               |
| Index ranges                                | -27 ≤ h ≤ 27, -7 ≤ k ≤ 8, -9 ≤ l ≤ 14                         |
| Reflections collected                       | 7410                                                          |
| Independent reflections                     | 2080 [R <sub>int</sub> = 0.0205, R <sub>sigma</sub> = 0.0205] |
| Data/restraints/parameters                  | 2080/0/120                                                    |
| Goodness-of-fit on F <sup>2</sup>           | 1.064                                                         |
| Final R indexes [I >= 2σ (I)]               | R <sub>1</sub> = 0.0306, wR <sub>2</sub> = 0.0833             |
| Final R indexes [all data]                  | R <sub>1</sub> = 0.0349, wR <sub>2</sub> = 0.0867             |
| Largest diff. peak/hole / e Å <sup>-3</sup> | 0.32/-0.28                                                    |

Table 2 Fractional Atomic Coordinates ( $\times 10^4$ ) and Equivalent Isotropic Displacement Parameters ( $\text{\AA}^2 \times 10^3$ ) for **15**.  $U_{\text{eq}}$  is defined as 1/3 of of the trace of the orthogonalised  $U_{ij}$  tensor.

| Atom | x         | y          | z          | U(eq)     |
|------|-----------|------------|------------|-----------|
| S1   | 4888.7(2) | 2475.9(4)  | 5969.1(3)  | 15.20(12) |
| O1   | 3769.9(4) | 1186.3(14) | 5314.5(8)  | 19.9(2)   |
| O2   | 6326.8(4) | 3863.7(14) | 4148.0(8)  | 18.1(2)   |
| O3   | 6808.2(5) | 4590.6(17) | 5910.2(9)  | 27.5(3)   |
| N2   | 4383.6(5) | 1802.6(16) | 3708.2(9)  | 14.5(2)   |
| N1   | 5384.8(5) | 2740.6(15) | 3839.4(10) | 14.1(2)   |

|    |           |            |            |         |
|----|-----------|------------|------------|---------|
| C6 | 6789.8(6) | 4604.9(18) | 4811.2(12) | 17.3(3) |
| C4 | 3846.7(6) | 1246.3(18) | 4202.4(12) | 15.0(3) |
| C2 | 5798.7(5) | 3277.9(18) | 4697.0(11) | 14.5(3) |
| C7 | 7244.0(6) | 5435(2)    | 3963.6(13) | 20.8(3) |
| C5 | 3372.4(6) | 725(2)     | 3281.7(12) | 20.5(3) |
| C1 | 4877.4(5) | 2310.4(17) | 4391.9(13) | 13.2(3) |
| C3 | 5628.6(6) | 3229.5(19) | 5891.3(11) | 16.1(3) |

Table 3 Anisotropic Displacement Parameters ( $\text{\AA}^2 \times 10^3$ ) for **15**. The Anisotropic displacement factor exponent takes the form:  $-2\pi^2[h^2a^*2U_{11}+2hka^*b^*U_{12}+\dots]$ .

| Atom | $U_{11}$  | $U_{22}$ | $U_{33}$ | $U_{23}$ | $U_{13}$ | $U_{12}$ |
|------|-----------|----------|----------|----------|----------|----------|
| S1   | 14.51(19) | 21.6(2)  | 9.54(17) | 0.22(11) | 1.14(10) | 0.47(11) |
| O1   | 17.2(5)   | 28.9(5)  | 13.6(5)  | 3.0(4)   | 3.0(3)   | -0.1(4)  |
| O2   | 14.2(4)   | 26.9(5)  | 13.3(4)  | -1.8(4)  | 0.5(3)   | -5.0(4)  |
| O3   | 21.4(5)   | 45.1(7)  | 15.9(5)  | -0.7(4)  | -3.6(4)  | -8.1(4)  |
| N2   | 12.6(5)   | 21.1(6)  | 9.7(5)   | 0.5(4)   | 0.3(4)   | -0.8(4)  |
| N1   | 12.6(5)   | 18.2(6)  | 11.5(5)  | -0.8(4)  | 0.8(4)   | -0.4(4)  |
| C6   | 13.8(6)   | 19.2(7)  | 18.9(6)  | -1.3(5)  | -2.2(5)  | 0.1(4)   |
| C4   | 13.3(6)   | 16.8(6)  | 15.0(6)  | 1.4(5)   | 1.2(4)   | 1.0(4)   |
| C2   | 13.6(6)   | 16.2(6)  | 13.7(6)  | -0.6(5)  | 0.7(4)   | -0.5(4)  |
| C7   | 14.8(6)   | 25.7(7)  | 21.9(7)  | 0.7(5)   | 0.0(5)   | -3.5(5)  |
| C5   | 13.9(6)   | 29.5(7)  | 18.1(6)  | 0.9(5)   | -0.6(5)  | -2.4(5)  |
| C1   | 13.6(6)   | 15.1(6)  | 10.9(6)  | 0.5(4)   | 0.6(4)   | 1.2(4)   |
| C3   | 15.6(6)   | 20.5(7)  | 12.2(6)  | -0.2(5)  | -0.6(4)  | -0.7(5)  |

Table 4 Bond Lengths for **15**.

| Atom | Atom | Length/ $\text{\AA}$ | Atom | Atom | Length/ $\text{\AA}$ |
|------|------|----------------------|------|------|----------------------|
| S1   | C1   | 1.7156(14)           | N2   | C1   | 1.3714(16)           |
| S1   | C3   | 1.7289(13)           | N1   | C2   | 1.3625(16)           |
| O1   | C4   | 1.2193(16)           | N1   | C1   | 1.3111(17)           |
| O2   | C6   | 1.3618(15)           | C6   | C7   | 1.4881(18)           |
| O2   | C2   | 1.3790(15)           | C4   | C5   | 1.4977(17)           |
| O3   | C6   | 1.1932(16)           | C2   | C3   | 1.3500(17)           |
| N2   | C4   | 1.3649(16)           |      |      |                      |

Table 5 Bond Angles for **15**.

| Atom | Atom | Atom | Angle/ $^\circ$ | Atom | Atom | Atom | Angle/ $^\circ$ |
|------|------|------|-----------------|------|------|------|-----------------|
| C1   | S1   | C3   | 89.24(6)        | N2   | C4   | C5   | 115.02(11)      |
| C6   | O2   | C2   | 122.05(10)      | N1   | C2   | O2   | 111.27(10)      |
| C4   | N2   | C1   | 124.12(11)      | C3   | C2   | O2   | 131.26(11)      |

|    |    |    |            |    |    |    |            |
|----|----|----|------------|----|----|----|------------|
| C1 | N1 | C2 | 109.38(11) | C3 | C2 | N1 | 117.41(11) |
| O2 | C6 | C7 | 109.86(11) | N2 | C1 | S1 | 124.72(10) |
| O3 | C6 | O2 | 123.40(12) | N1 | C1 | S1 | 115.30(10) |
| O3 | C6 | C7 | 126.73(12) | N1 | C1 | N2 | 119.98(12) |
| O1 | C4 | N2 | 121.39(12) | C2 | C3 | S1 | 108.64(9)  |
| O1 | C4 | C5 | 123.59(11) |    |    |    |            |

Table 6 Hydrogen Atom Coordinates ( $\text{\AA} \times 10^4$ ) and Isotropic Displacement Parameters ( $\text{\AA}^2 \times 10^3$ ) for **15**.

| Atom | <i>x</i> | <i>y</i> | <i>z</i> | U(eq) |
|------|----------|----------|----------|-------|
| H2   | 4414.91  | 1837.55  | 2900.05  | 17    |
| H7A  | 7230.56  | 4788.6   | 3168.81  | 31    |
| H7B  | 7647.5   | 5306.63  | 4323.17  | 31    |
| H7C  | 7153.04  | 6758.01  | 3840.74  | 31    |
| H5A  | 3221.94  | -528.37  | 3464.69  | 31    |
| H5B  | 3546.43  | 744.43   | 2451.54  | 31    |
| H5C  | 3038.53  | 1617.02  | 3326.56  | 31    |
| H3   | 5874.58  | 3555.2   | 6575.21  | 19    |

### Compound **19** CCDC 2330480

Table 1 Crystal data and structure refinement for **19**.

|                                         |                                             |
|-----------------------------------------|---------------------------------------------|
| Identification code                     | AVS_30_11_23_dry_auto                       |
| Empirical formula                       | $\text{C}_5\text{H}_5\text{ClN}_2\text{OS}$ |
| Formula weight                          | 176.62                                      |
| Temperature/K                           | 100.01(10)                                  |
| Crystal system                          | triclinic                                   |
| Space group                             | P-1                                         |
| <i>a</i> /\AA                           | 5.0499(2)                                   |
| <i>b</i> /\AA                           | 7.4591(3)                                   |
| <i>c</i> /\AA                           | 9.4964(3)                                   |
| $\alpha$ /°                             | 90.462(3)                                   |
| $\beta$ /°                              | 91.106(3)                                   |
| $\gamma$ /°                             | 108.081(4)                                  |
| Volume/\AA <sup>3</sup>                 | 339.94(2)                                   |
| <i>Z</i>                                | 2                                           |
| $\rho_{\text{calc}}$ /g/cm <sup>3</sup> | 1.725                                       |
| $\mu$ /mm <sup>-1</sup>                 | 0.790                                       |
| F(000)                                  | 180.0                                       |
| Crystal size/mm <sup>3</sup>            | 0.1 × 0.02 × 0.02                           |
| Radiation                               | Mo K $\alpha$ ( $\lambda = 0.71073$ )       |

|                                                  |                                                               |
|--------------------------------------------------|---------------------------------------------------------------|
| 2 $\theta$ range for data collection/ $^{\circ}$ | 4.29 to 60.426                                                |
| Index ranges                                     | $-6 \leq h \leq 6, -10 \leq k \leq 10, -13 \leq l \leq 13$    |
| Reflections collected                            | 7149                                                          |
| Independent reflections                          | 1682 [ $R_{\text{int}} = 0.0437, R_{\text{sigma}} = 0.0246$ ] |
| Data/restraints/parameters                       | 1682/0/92                                                     |
| Goodness-of-fit on $F^2$                         | 1.067                                                         |
| Final R indexes [ $I \geq 2\sigma(I)$ ]          | $R_1 = 0.0251, wR_2 = 0.0691$                                 |
| Final R indexes [all data]                       | $R_1 = 0.0264, wR_2 = 0.0701$                                 |
| Largest diff. peak/hole / $e \text{ \AA}^{-3}$   | 0.46/-0.33                                                    |

Table 2 Fractional Atomic Coordinates ( $\times 10^4$ ) and Equivalent Isotropic Displacement Parameters ( $\text{\AA}^2 \times 10^3$ ) for **19**.  $U_{\text{eq}}$  is defined as 1/3 of of the trace of the orthogonalised  $U_{ij}$  tensor.

| Atom | $x$        | $y$        | $z$        | $U(\text{eq})$ |
|------|------------|------------|------------|----------------|
| S1   | 2669.8(6)  | 1879.7(4)  | 5997.4(3)  | 11.08(10)      |
| Cl1  | 1273.9(6)  | 2319.4(4)  | 9030.3(3)  | 14.75(10)      |
| O1   | 2940.6(19) | 1076.5(13) | 3269.9(10) | 18.4(2)        |
| N2   | 6930(2)    | 3117.6(14) | 4156.9(10) | 11.1(2)        |
| N1   | 7566(2)    | 4298.3(14) | 6464.7(11) | 12.3(2)        |
| C3   | 5982(2)    | 3202.7(16) | 5493.4(12) | 10.0(2)        |
| C2   | 6167(3)    | 4112.6(17) | 7714.4(13) | 12.9(2)        |
| C4   | 5350(3)    | 2019.3(16) | 3096.5(12) | 12.2(2)        |
| C5   | 6863(3)    | 2085.8(18) | 1737.5(13) | 15.4(2)        |
| C1   | 3554(3)    | 2884.7(16) | 7664.4(12) | 12.1(2)        |

Table 3 Anisotropic Displacement Parameters ( $\text{\AA}^2 \times 10^3$ ) for **19**. The Anisotropic displacement factor exponent takes the form:  $-2\pi^2[h^2a^2U_{11}+2hka^*b^*U_{12}+\dots]$ .

| Atom | $U_{11}$  | $U_{22}$  | $U_{33}$  | $U_{23}$  | $U_{13}$ | $U_{12}$  |
|------|-----------|-----------|-----------|-----------|----------|-----------|
| S1   | 7.56(16)  | 11.78(16) | 11.48(16) | -0.33(11) | 2.27(11) | -0.64(11) |
| Cl1  | 12.32(17) | 18.38(17) | 11.78(16) | 0.46(11)  | 5.50(11) | 1.87(12)  |
| O1   | 10.9(4)   | 20.2(5)   | 18.7(5)   | -4.6(4)   | 1.2(3)   | -2.9(4)   |
| N2   | 7.1(5)    | 12.5(5)   | 11.3(5)   | -0.4(4)   | 2.3(4)   | -0.6(4)   |
| N1   | 9.2(5)    | 13.1(5)   | 12.7(5)   | -0.6(4)   | 1.4(4)   | 1.0(4)    |
| C3   | 6.8(5)    | 10.3(5)   | 12.3(5)   | 1.0(4)    | 1.5(4)   | 1.5(4)    |
| C2   | 11.4(6)   | 14.9(5)   | 12.1(5)   | -0.9(4)   | 0.7(4)   | 3.4(4)    |
| C4   | 11.3(6)   | 11.4(5)   | 13.2(5)   | -0.9(4)   | 0.8(4)   | 2.4(4)    |
| C5   | 14.7(6)   | 17.4(6)   | 12.3(5)   | -2.5(4)   | 2.2(4)   | 2.5(5)    |
| C1   | 11.6(5)   | 13.9(5)   | 10.9(5)   | 0.5(4)    | 2.6(4)   | 4.1(4)    |

Table 4 Bond Lengths for **19**.

| Atom | Atom | Length/Å   | Atom | Atom | Length/Å   |
|------|------|------------|------|------|------------|
| S1   | C3   | 1.7362(12) | N2   | C4   | 1.3681(15) |
| S1   | C1   | 1.7359(12) | N1   | C3   | 1.3086(15) |
| Cl1  | C1   | 1.7180(12) | N1   | C2   | 1.3789(15) |
| O1   | C4   | 1.2169(16) | C2   | C1   | 1.3522(18) |
| N2   | C3   | 1.3730(15) | C4   | C5   | 1.5058(17) |

Table 5 Bond Angles for **19**.

| Atom | Atom | Atom | Angle/°    | Atom | Atom | Atom | Angle/°    |
|------|------|------|------------|------|------|------|------------|
| C1   | S1   | C3   | 87.21(6)   | O1   | C4   | N2   | 121.57(11) |
| C4   | N2   | C3   | 123.44(11) | O1   | C4   | C5   | 124.27(11) |
| C3   | N1   | C2   | 109.99(10) | N2   | C4   | C5   | 114.15(10) |
| N2   | C3   | S1   | 122.68(9)  | Cl1  | C1   | S1   | 121.79(7)  |
| N1   | C3   | S1   | 116.33(9)  | C2   | C1   | S1   | 111.61(9)  |
| N1   | C3   | N2   | 121.00(11) | C2   | C1   | Cl1  | 126.60(10) |
| C1   | C2   | N1   | 114.85(11) |      |      |      |            |

Table 6 Hydrogen Atom Coordinates ( $\text{\AA} \times 10^4$ ) and Isotropic Displacement Parameters ( $\text{\AA}^2 \times 10^3$ ) for **19**.

| Atom | <i>x</i> | <i>y</i> | <i>z</i> | U(eq) |
|------|----------|----------|----------|-------|
| H2   | 8643.35  | 3805.52  | 3972.81  | 13    |
| H2A  | 6975.64  | 4794.88  | 8546.6   | 16    |
| H5A  | 5652.16  | 1198.5   | 1053.63  | 23    |
| H5B  | 8557.7   | 1737.16  | 1911.78  | 23    |
| H5C  | 7365.39  | 3365.14  | 1362.57  | 23    |
